# Supplementary material for: The dopamine receptor D 5 gene shows signs of independent erosion in toothed and baleen whales
Source: PeerJ journal article supplement (doi:10.7717/peerj.7758), 2019-10-11

Genomic tracks showing DNA sequences for various samples. The tracks are labeled with sample IDs and coordinates. The sequences are color-coded by nucleotide: A (green), C (blue), G (red), and T (black).

Tracks shown (from top to bottom):

- ATA\_DRD5
- Frame 1
- HD\_gnl|SRR609013.104407470.104444073
- Frame 1
- HD\_gnl|SRR609014.318789219.2
- Frame 1
- HD\_gnl|SRR609013.407009563.2
- Frame 1
- HD\_gnl|SRR609013.155927881.2
- Frame 1
- HD\_gnl|SRR609013.155927881.2
- Frame 1
- HD\_gnl|SRR609013.167696895.1
- Frame 1
- HD\_gnl|SRR609013.167696895.1
- Frame 1
- REV\_gnl|SRR609013.35086697.2
- Frame 1
- REV\_gnl|SRR609013.35086697.2
- Frame 1
- HD\_gnl|SRR609014.160609543.1
- Frame 1
- HD\_gnl|SRR609013.123414903.2
- Frame 1
- HD\_gnl|SRR609013.186108799.1
- Frame 1
- HD\_gnl|SRR609013.123414903.2
- Frame 1
- HD\_gnl|SRR609014.279703307.2
- Frame 1
- HD\_gnl|SRR609013.186108799.1
- Frame 1
- HD\_gnl|SRR609014.326437326.2
- Frame 1
- HD\_gnl|SRR609014.235165760.1
- Frame 1
- HD\_gnl|SRR609014.1404827.1
- Frame 1
- HD\_well|SRR6060013.480136809.1
- Frame 1

## *Bison bison bison* SRA confirmation of the absence of 1-nucleotide insertion

SRA experiment searched:

SRX1766681 - PRJNA321590 - Sichuan university

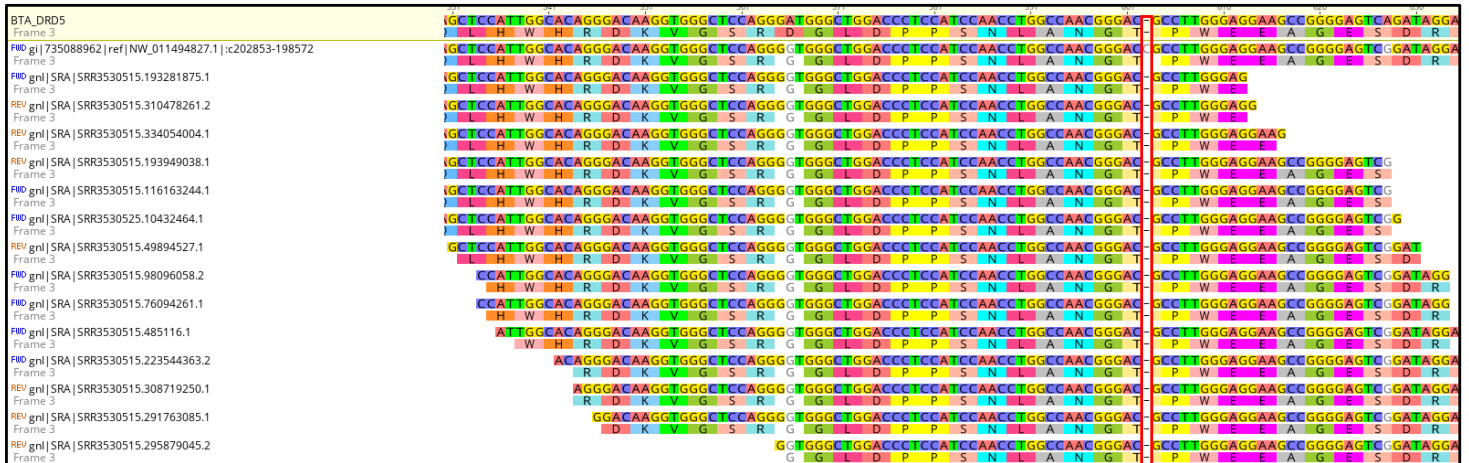

## *Phascolarctos cinereus* SRA confirmation of the absence of 1 nucleotide deletion

SRA experiments searched:

ERX376153 - PRJEB5196 – BRAEMBL

ERX1942092 - PRJEB19982 - Koala genome consortium

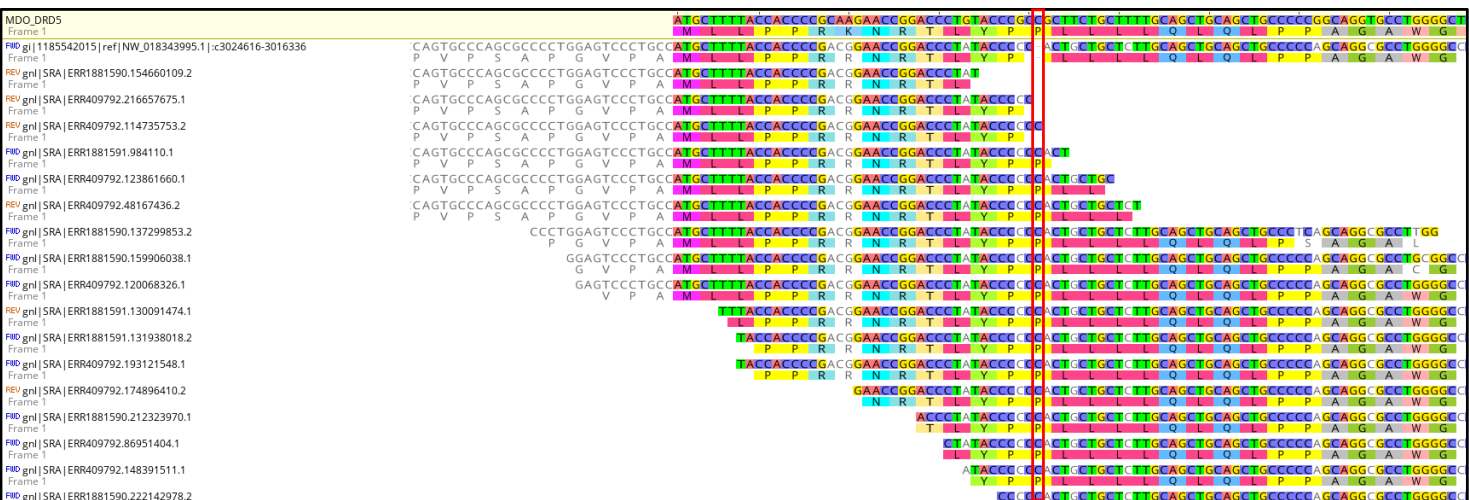

## *Ochotona princeps* SRA reads supporting a premature stop codon and reads supporting its absence in the same species

SRA experiment searched:

Entire set of SRX experiments from the BioProject PRJNA74593 - Broad Institute

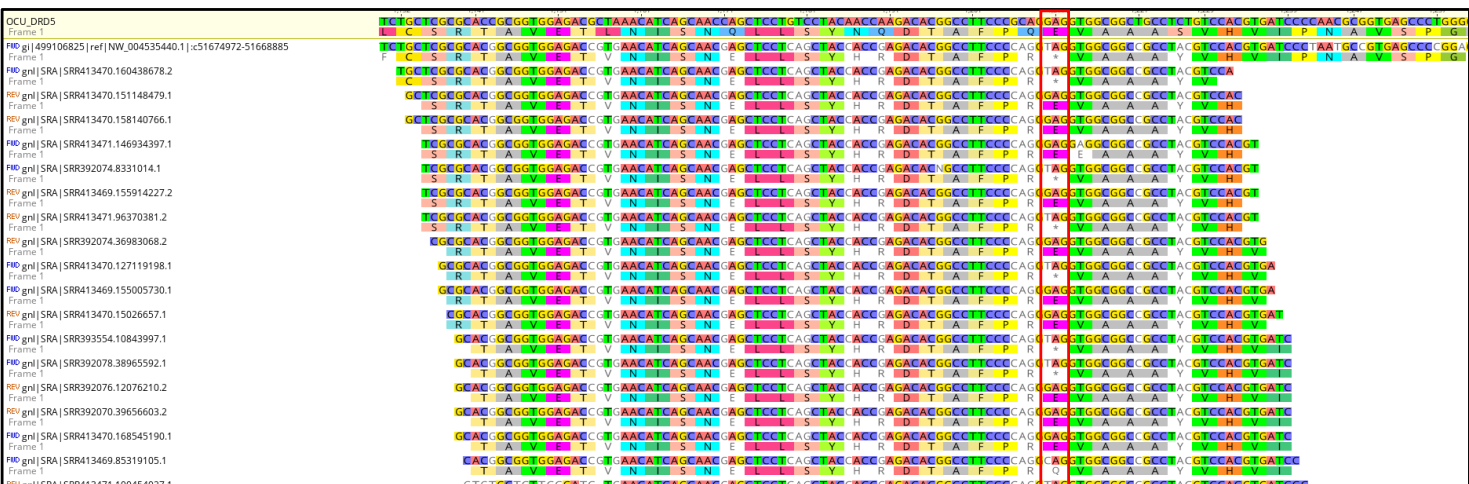

Supplement: Supplementary_Material_2.pdf [file Supplementary_Material_2.pdf]
